# Supplementary material for: Effect of Osmotic Pressure on Whey Protein Concentration in Forward Osmosis
Source: MDPI journal article supplement (doi:10.3390/membranes11080573), 2021-07-29
Supplement: s1 [file s1]

# Effect of Osmotic Pressure on Whey Protein Concentration in Forward Osmosis

Pelin Oymaci, Pauline E. Offeringa, Zandrie Borneman and Kitty Nijmeijer \*

Membrane Materials and Processes, Department of Chemical Engineering and Chemistry, Eindhoven University of Technology, P.O. Box 513, 5600 MB Eindhoven, The Netherlands; p.oymaci.akin@tue.nl (P.O.); p.e.offeringa@student.tue.nl (P.E.O.); z.borneman@tue.nl (Z.B.)

\* Correspondence: d.c.nijmeijer@tue.nl; Tel.: +31-40-247-2871

**Table S1.** Feed UPW solution conductivities of initial and final stages after 1 hours of operation at different DS concentrations.

| Initial DS Concentration (M) | FS conductivity<br>( $\mu\text{S}/\text{cm}$ ) |                  |
|------------------------------|------------------------------------------------|------------------|
|                              | Initial                                        | Final            |
| 0.25                         | $3.7 \pm 0.0$                                  | $33.6 \pm 1.3$   |
| 0.5                          | $4.5 \pm 0.3$                                  | $48.7 \pm 5.9$   |
| 1.2                          | $7.1 \pm 1.8$                                  | $80.5 \pm 15.7$  |
| 2.5                          | $12.4 \pm 2.5$                                 | $179.5 \pm 47.4$ |
| 4.5                          | $11.1 \pm 0.8$                                 | $224.5 \pm 21.9$ |

**Table S2.** Feed whey solution conductivities of initial and final stages after 5.5 hours of operation at different DS concentrations.

| Initial DS Concentration (M) | FS Conductivity<br>( $\mu\text{S}/\text{cm}$ ) |                |
|------------------------------|------------------------------------------------|----------------|
|                              | Initial                                        | Final          |
| 0.25                         | $192 \pm 10$                                   | $481 \pm 13$   |
| 0.5                          | $187 \pm 6$                                    | $503 \pm 74$   |
| 1.2                          | $243 \pm 13$                                   | $1155 \pm 191$ |
| 2.5                          | $257 \pm 18$                                   | $3265 \pm 926$ |
| 4.5                          | $217 \pm 33$                                   | $3180 \pm 127$ |

**Table S3.** Osmotic pressure values of various concentrations of NaCl solution.

| NaCl Concentration (M) | Osmotic Pressure (bar) |
|------------------------|------------------------|
| 0.11                   | 5.1                    |
| 0.50                   | 22.5                   |
| 1.00                   | 46.3                   |
| 1.49                   | 70.8                   |
| 2.04                   | 100.5                  |
| 2.53                   | 128.9                  |
| 3.03                   | 158.8                  |
| 3.52                   | 189.9                  |
| 4.02                   | 222.1                  |
| 4.51                   | 255.1                  |
| 5.01                   | 288.9                  |
